# Supplementary material for: Impact of chemotherapy on the expression of claudins and cadherins in invasive breast cancer
Source: PubMed Central journal article supplement — Exp Ther Med. 2019 Aug 20;18(4):3014–24. doi: 10.3892/etm.2019.7930 (PMC6755479; doi:10.3892/etm.2019.7930), 2019-08-20
Supplement: Supplementary_Data1.pdf [file Supplementary_Data1.pdf]

Figure S1. Representative images of the switch in HER2 status, from negative prior to therapy to positive following therapy as revealed by IHC and verified by FISH. (A) No visible staining of HER2 in a core needle biopsy prior to therapy. IHC, magnification, x400. (B) Weak-to-moderate incomplete membranous staining in >10% of the tumour cells, scored as 2+ (positive). IHC, magnification, x400. (C and D) Two-colour FISH using a specific probe for the *HER2* gene (red) and CEP17 (green). Magnification, x1,000. The ratio of HER2/CEP17 was (C) 1.6 prior to and (D) 3.4 following therapy. A positive result was defined as  $HER2/CEP17 \geq 2$ . HER2, human epidermal growth factor receptor 2; IHC, immunohistochemistry; FISH, fluorescence *in situ* hybridization; CEP17, centromere of chromosome 17.

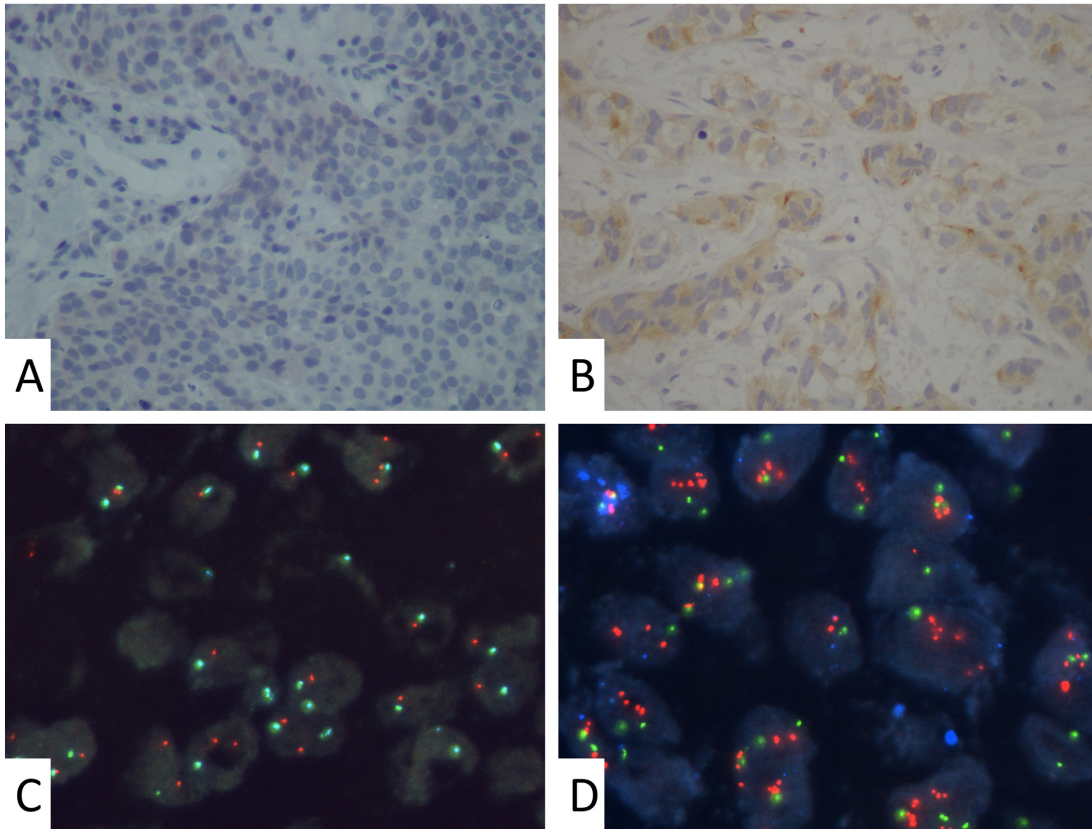

Figure S2. Representative images of the expression of claudins in non-cancerous breast tissue. (A) A non-cancerous duct (black arrow) surrounded by scattered nests of invasive carcinoma of no special type (white arrows) in a fibrous stroma. In the well-arranged areas of the duct, punctate membranous expression of claudin-1 was mostly concentrated in the apical region and at the adjacent lateral parts of the luminal cells. Neoplastic cells expressed claudin-1 with approximately similar intensity to non-cancerous cells but in a disorganized manner. IHC, magnification, x200. (B) A terminal tubulo-lobular unit with predominantly apical expression of claudin-1, which is typically less intense than the expression of claudin-3 and -4. IHC, magnification, x200. (C and D) The same terminal tubulo-lobular unit with strong continuous membranous expression of (C) claudin-3 and (D) claudin-4 in the apical and lateral parts of the luminal cells. IHC, magnification, x200. IHC, immunohistochemistry.

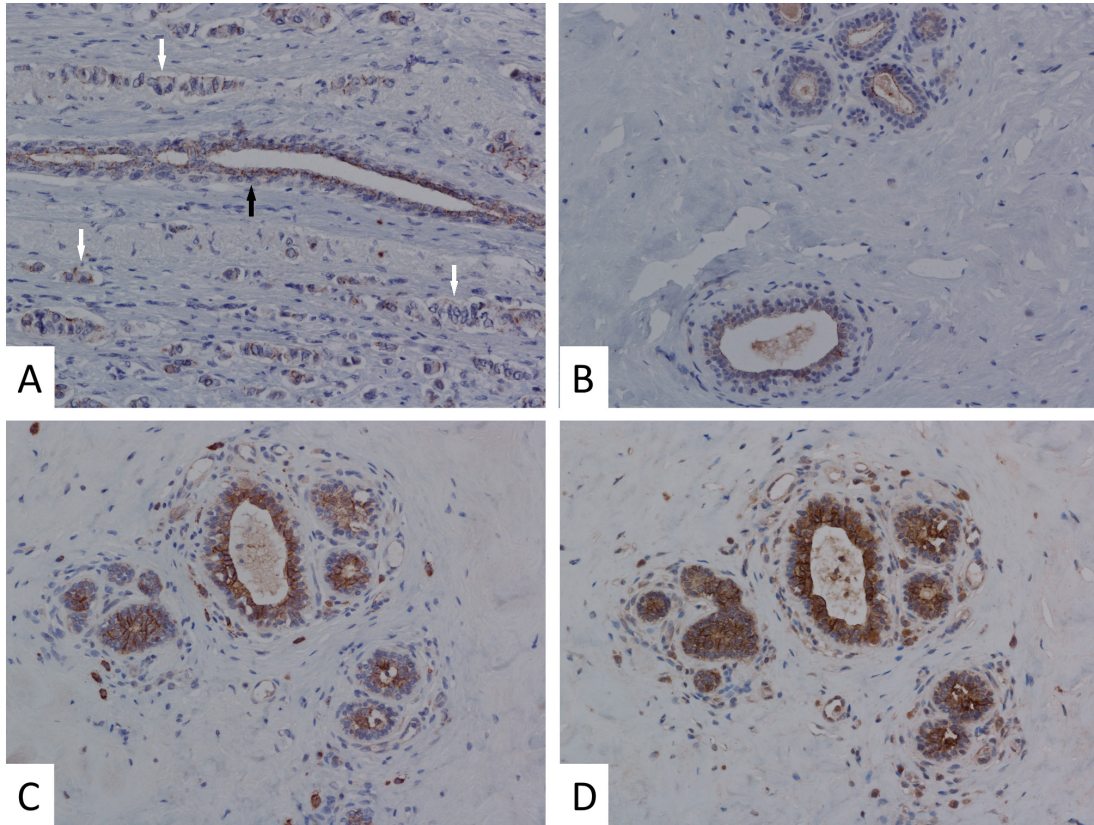

Table SI. Association between the expression of claudin-1 and the standard BC and EMT markers in 62 patients with BC before and after chemotherapy.

| sp<br>Characteristic      | Before chemotherapy |     |                    | After chemotherapy |     |                    |
|---------------------------|---------------------|-----|--------------------|--------------------|-----|--------------------|
|                           | Claudin-1           |     | P-value            | Claudin-1          |     | P-value            |
|                           | High                | Low |                    | High               | Low |                    |
| Grade                     |                     |     | 0.144              |                    |     | 0.053              |
| G1-2                      | 13                  | 26  |                    | 16                 | 20  |                    |
| G3                        | 12                  | 11  |                    | 18                 | 8   |                    |
| ER                        |                     |     | 0.016 <sup>a</sup> |                    |     | 0.156              |
| Positive                  | 14                  | 31  |                    | 24                 | 24  |                    |
| Negative                  | 11                  | 6   |                    | 10                 | 4   |                    |
| PR                        |                     |     | 0.144              |                    |     | 0.031 <sup>a</sup> |
| Positive                  | 13                  | 26  |                    | 15                 | 20  |                    |
| Negative                  | 11                  | 12  |                    | 19                 | 8   |                    |
| HER2                      |                     |     | 1.000              |                    |     | 0.021 <sup>a</sup> |
| Positive                  | 4                   | 5   |                    | 3                  | 9   |                    |
| Negative                  | 21                  | 32  |                    | 31                 | 19  |                    |
| Ki-67                     |                     |     | 0.350              |                    |     | 0.026 <sup>a</sup> |
| High                      | 19                  | 24  |                    | 18                 | 7   |                    |
| Low                       | 6                   | 13  |                    | 16                 | 21  |                    |
| E-cadherin                |                     |     | 0.526              |                    |     | 0.107              |
| Aberrant                  | 5                   | 10  |                    | 7                  | 11  |                    |
| Normal                    | 20                  | 27  |                    | 27                 | 17  |                    |
| N-cadherin                |                     |     | 0.977              |                    |     | 0.844              |
| Positive                  | 6                   | 9   |                    | 8                  | 6   |                    |
| Negative                  | 19                  | 28  |                    | 26                 | 22  |                    |
| TNBC                      |                     |     | 0.038 <sup>a</sup> |                    |     | 0.015 <sup>a</sup> |
| TNBC                      | 8                   | 4   |                    | 9                  | 1   |                    |
| ER-, PR- or HER2-positive | 17                  | 33  |                    | 25                 | 27  |                    |

<sup>a</sup>Significant association (P<0.05). BC, breast cancer; EMT, epithelial-mesenchymal transition; ER, oestrogen receptor; PR, progesterone receptor; Ki-67, marker of proliferation Ki-67; TNBC, triple-negative breast cancer (ER-, PR- and HER2-negative).

Table SII. Association between the expression of claudin-3 and the standard BC and EMT markers in 62 patients with BC after chemotherapy.

| Characteristic            | Claudin-3 |     | P-value            |
|---------------------------|-----------|-----|--------------------|
|                           | High      | Low |                    |
| Grade                     |           |     | 0.277              |
| G1-2                      | 28        | 8   |                    |
| G3                        | 23        | 3   |                    |
| ER                        |           |     | 0.700              |
| Positive                  | 39        | 9   |                    |
| Negative                  | 12        | 2   |                    |
| PR                        |           |     | 0.596              |
| Positive                  | 28        | 7   |                    |
| Negative                  | 23        | 4   |                    |
| HER2                      |           |     | 0.464              |
| Positive                  | 9         | 3   |                    |
| Negative                  | 42        | 8   |                    |
| Ki-67                     |           |     | 0.702              |
| High                      | 20        | 5   |                    |
| Low                       | 31        | 6   |                    |
| E-cadherin                |           |     | 0.005 <sup>a</sup> |
| Aberrant                  | 11        | 7   |                    |
| Normal                    | 40        | 4   |                    |
| N-cadherin                |           |     | 0.484              |
| Positive                  | 12        | 2   |                    |
| Negative                  | 39        | 9   |                    |
| TNBC                      |           |     | 0.484              |
| TNBC                      | 9         | 1   |                    |
| ER-, PR- or HER2-positive | 42        | 10  |                    |

<sup>a</sup>Significant association (P<0.05). BC, breast cancer; EMT, epithelial-mesenchymal transition; ER, oestrogen receptor; PR, progesterone receptor; Ki-67, marker of proliferation Ki-67; TNBC, triple-negative breast cancer (ER-, PR- and HER2-negative).

Table SIII. Association between the expression of EMT markers and standard BC markers in 62 patients with BC.

| Characteristic            | Before chemotherapy |          |         |            |          |                    | After chemotherapy |          |         |            |          |                    |
|---------------------------|---------------------|----------|---------|------------|----------|--------------------|--------------------|----------|---------|------------|----------|--------------------|
|                           | E-cadherin          |          |         | N-cadherin |          |                    | E-cadherin         |          |         | N-cadherin |          |                    |
|                           | Normal              | Aberrant | P-value | Negative   | Positive | P-value            | Normal             | Aberrant | P-value | Negative   | Positive | P-value            |
| Grade                     |                     |          |         |            |          |                    |                    |          |         |            |          |                    |
| G1-2                      | 28                  | 11       | 0.337   | 33         | 6        | 0.035 <sup>a</sup> | 26                 | 10       | 0.798   | 32         | 4        | 0.011 <sup>a</sup> |
| G3                        | 19                  | 4        |         | 14         | 9        |                    | 18                 | 8        |         | 16         | 10       |                    |
| ER                        |                     |          |         |            |          |                    |                    |          |         |            |          |                    |
| Positive                  | 35                  | 10       | 0.555   | 38         | 7        | 0.010 <sup>a</sup> | 35                 | 13       | 0.531   | 38         | 10       | 0.542              |
| Negative                  | 12                  | 5        |         | 9          | 8        |                    | 9                  | 5        |         | 10         | 4        |                    |
| PR                        |                     |          |         |            |          |                    |                    |          |         |            |          |                    |
| Positive                  | 32                  | 7        | 0.135   | 33         | 6        | 0.035 <sup>a</sup> | 25                 | 10       | 0.927   | 28         | 7        | 0.580              |
| Negative                  | 15                  | 8        |         | 14         | 9        |                    | 19                 | 8        |         | 20         | 7        |                    |
| HER2                      |                     |          |         |            |          |                    |                    |          |         |            |          |                    |
| Positive                  | 6                   | 3        | 0.674   | 5          | 4        | 0.201              | 8                  | 4        | 0.715   | 6          | 6        | 0.011 <sup>a</sup> |
| Negative                  | 41                  | 12       |         | 42         | 11       |                    | 36                 | 14       |         | 42         | 8        |                    |
| Ki-67                     |                     |          |         |            |          |                    |                    |          |         |            |          |                    |
| High                      | 32                  | 11       | 0.701   | 31         | 12       | 0.304              | 16                 | 9        | 0.320   | 17         | 8        | 0.145              |
| Low                       | 15                  | 4        |         | 16         | 3        |                    | 28                 | 9        |         | 31         | 6        |                    |
| E-cadherin                |                     |          |         |            |          |                    |                    |          |         |            |          |                    |
| Aberrant                  | -                   | -        |         | 9          | 6        | 0.101              | -                  | -        |         | 14         | 4        | 0.966              |
| Normal                    | -                   | -        |         | 38         | 9        |                    | -                  | -        |         | 34         | 10       |                    |
| N-cadherin                |                     |          |         |            |          |                    |                    |          |         |            |          |                    |
| Positive                  | 9                   | 6        | 0.101   | -          | -        |                    | 10                 | 4        | 0.966   | -          | -        |                    |
| Negative                  | 38                  | 9        |         | -          | -        |                    | 34                 | 14       |         | -          | -        |                    |
| TNBC                      |                     |          |         |            |          |                    |                    |          |         |            |          |                    |
| TNBC                      | 9                   | 3        | 1.000   | 7          | 5        | 0.116              | 6                  | 4        | 0.404   | 8          | 2        | 0.831              |
| ER-, PR- or HER2-positive | 38                  | 38       | 12      | 40         | 40       | 10                 | 38                 | 38       | 14      | 40         | 40       | 12                 |

<sup>a</sup>Significant association (P<0.05). BC, breast cancer; EMT, epithelial-mesenchymal transition; ER, oestrogen receptor; PR, progesterone receptor; Ki-67, marker of proliferation Ki-67; TNBC, triple-negative breast cancer (ER-, PR- and HER2-negative).
